# Supplementary material for: Beta-adrenergic receptors are critical for weight loss but not for other metabolic adaptations to the consumption of a ketogenic diet in male mice
Source: PubMed Central journal article supplement — Mol Metab. 2017 Jun 6;6(8):854–62. doi: 10.1016/j.molmet.2017.05.017 (PMC5518722; doi:10.1016/j.molmet.2017.05.017), 2017-06-06
Supplement: mmc1.pdf [file mmc1.pdf]

## APPENDIX. SUPPLEMENTARY DATA

Supplementary Table 1

| <b>Primer</b> | <b><i>Forward</i></b>   | <b><i>Reverse</i></b>   |
|---------------|-------------------------|-------------------------|
| BDH1          | AGTTTGGGGTCGAGGCTTTC    | TGGTGGCCGCTATGAAGTTG    |
| C/EBP $\beta$ | GCAAGAGCCGCGACAAG       | GGCTCGGGCAGCTGCTT       |
| CD36          | GCAGCACAGTGGACATTCAT    | TTGCATTTCCACAGCAGAAG    |
| CIDEA         | TGCTCTTCTGTATCGCCAGT    | GCCGTGTTAAGGAATCTGCTG   |
| Cox7a         | AAAACCGTGTGGCAGAGAAG    | CCAGCCCAAGCAGTATAAGC    |
| Cox8b         | TGCGAAGTTCACAGTGGTTC    | TGCTGCGGAGCTCTTTTTAT    |
| CPT1 $\alpha$ | AAACCACCAGGCTACAGTG     | TCCTTGTAATGTGCGAGCTG    |
| CPT1 $\beta$  | GTCGCTTCTTCAAGGTCTGG    | AAGAAAGCAGCACGTTCGAT    |
| FAS           | GGTTACACTGTGCTAGGTGTTG  | TCCAGGCGCATGAGGCTCAGC   |
| FGF21         | CTGGGGGTCTACCAAGCATA    | CACCCAGGATTTGAATGACC    |
| HADH          | ACTACATCAAAATGGGCTCTCAG | AGCAGAAATGGAATGCGGACC   |
| HMGCS2        | ATCAACTCCCTGTGCCTGAC    | GCAATGTCACCACAGACCAC    |
| LCAD          | TCTTTTCCTCGGAGCATGACA   | GACCTCTCTACTCACTTCTCCAG |
| MCAD          | TTTGGGGAGAATGACTGAGG    | CGGGGGTATCTGCTTCCACA    |
| SCD-1         | GCGTTCCAGAATGACGTGTAC   | CTTTCAGGTCAGACATGTCCAG  |
| TBP           | AATGACTCACAAGGCAATGTCG  | AGCTTTTCTAGCCGTTTCAAT   |
| UCP1          | ACTGCCACACCTCCAGTCATT   | CTTTCCTCACTCAGGATTGG    |
| UCP2          | TGCTGAGCTGGTGACCTATG    | GAGCATGGTAAGGGCACAGT    |
| VLCAD         | TATCTCTGCCAGCGACTTT     | TGGGTATGGGAACACCTGAT    |
